# Supplementary material
Source: PubMed Central journal article supplement (PMC3612859)

## Supplemental data for Zhong and Yazdanbakhsh

**Figure 1.** Representative histogram and gating strategy based on isotype control (A) for intracellular Foxp3 expression (B) as well as isotype control (C) and intracellular Helios expression (D) are shown. Similarly, representative gating strategy based on isotype control (E) for surface TNFRII expression (F) is indicated. The percent reactivity for each specificity is shown.

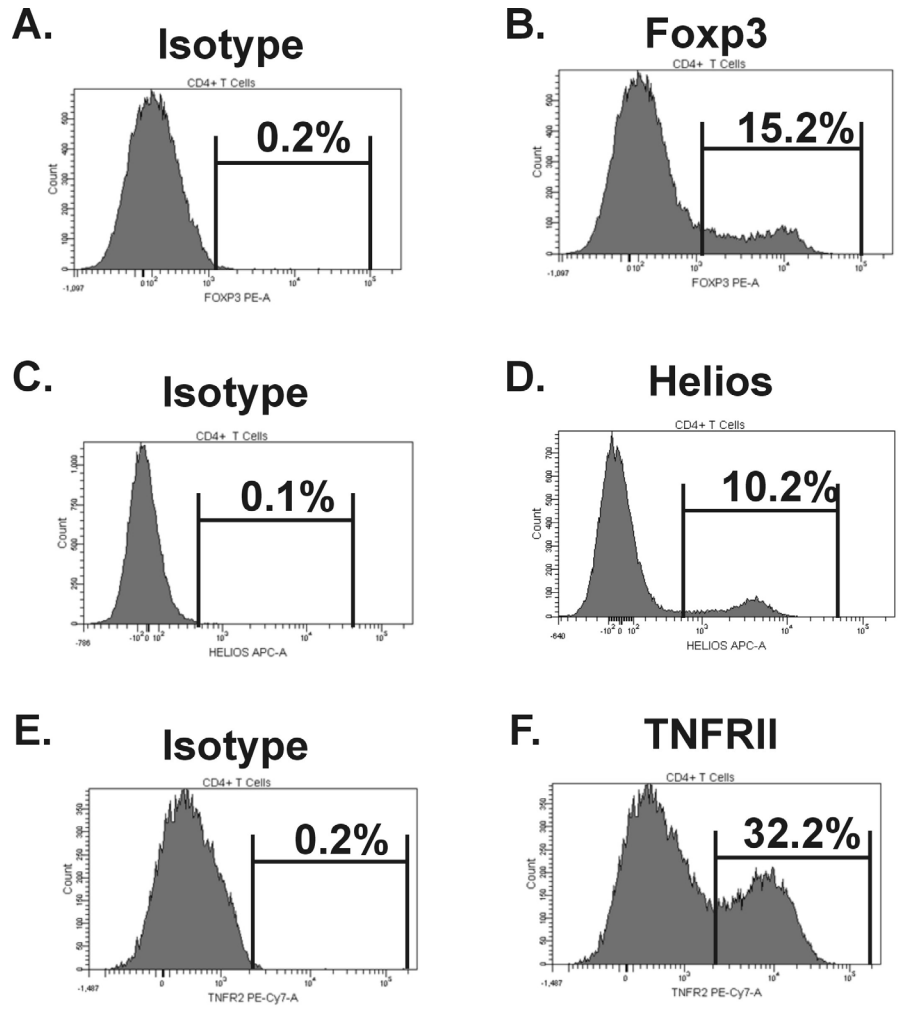

Supplement: supp_blood-2012-11-469122_blood-2012-11-469122-1.pdf [file supp_blood-2012-11-469122_blood-2012-11-469122-1.pdf]
